# Supplementary material for: Real-time assay of inorganic pyrophosphatase activity in the red region based on Li+-doped NaYF4:Yb,Er upconversion luminescent nanoparticles
Source: Royal Society of Chemistry journal article supplement (doi:10.1039/c7ay00444c), 2017-01-01
Supplement: c7ay00444c1.pdf [file c7ay00444c1.pdf]

## Supporting Information

### Real-Time Assay of Inorganic Pyrophosphatase Activity in Red Region Based on Li<sup>+</sup>-doped NaYF<sub>4</sub>:Yb,Er Upconversion Luminescence Nanoparticles

Lei Wang, Yuan Ji, Yuezheng He, Lun Wang,\* Hongqi Chen\*

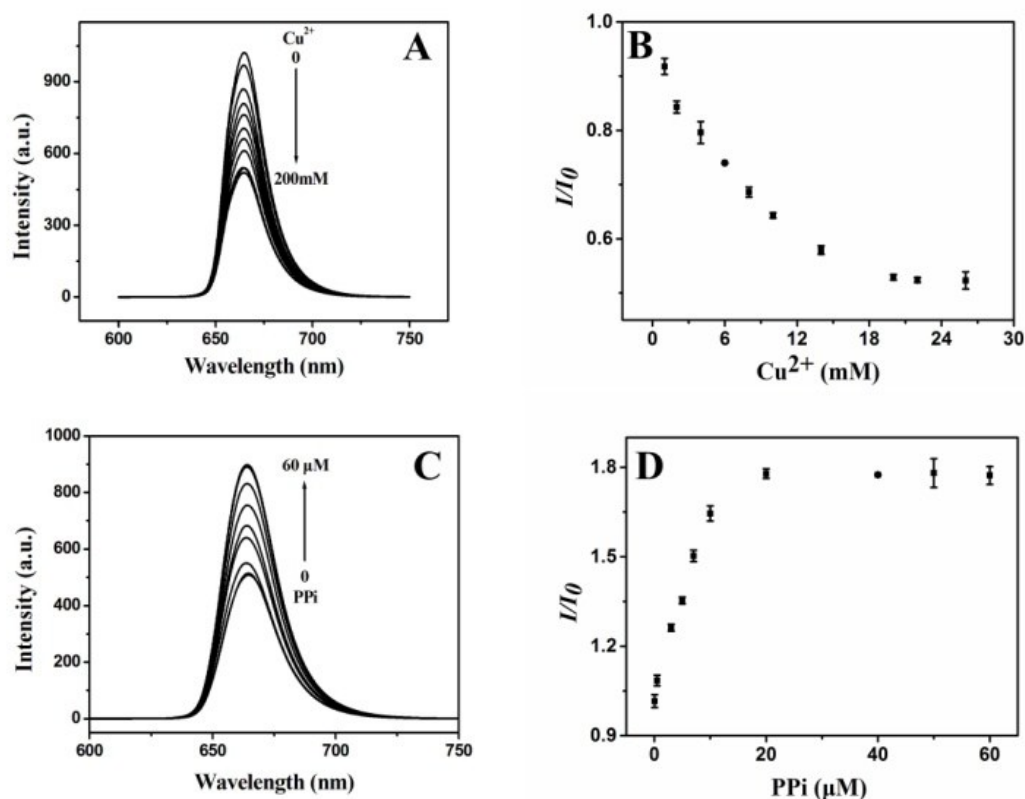

Figure S1(A). The luminescence spectra and (B). Plot of the luminescence intensity versus Cu<sup>2+</sup> ion concentration ( $I$  and  $I_0$  represent the luminescence intensity in the presence and absence of Cu<sup>2+</sup> respectively) of Li<sup>+</sup>-doped NaYF<sub>4</sub>:Yb,Er UCLNPs in the presence of Cu<sup>2+</sup>; (C). Luminescence spectra and (D). Plot of luminescence intensity versus PPI concentration ( $I$  and  $I_0$  represent the luminescence intensity in the presence and absence of PPI respectively) of the Li<sup>+</sup>-doped NaYF<sub>4</sub>:Yb,Er-Cu<sup>2+</sup> complexes with the addition of different PPI concentrations. Experiments were performed in HEPES buffer (10.0 mM, pH 7.2).

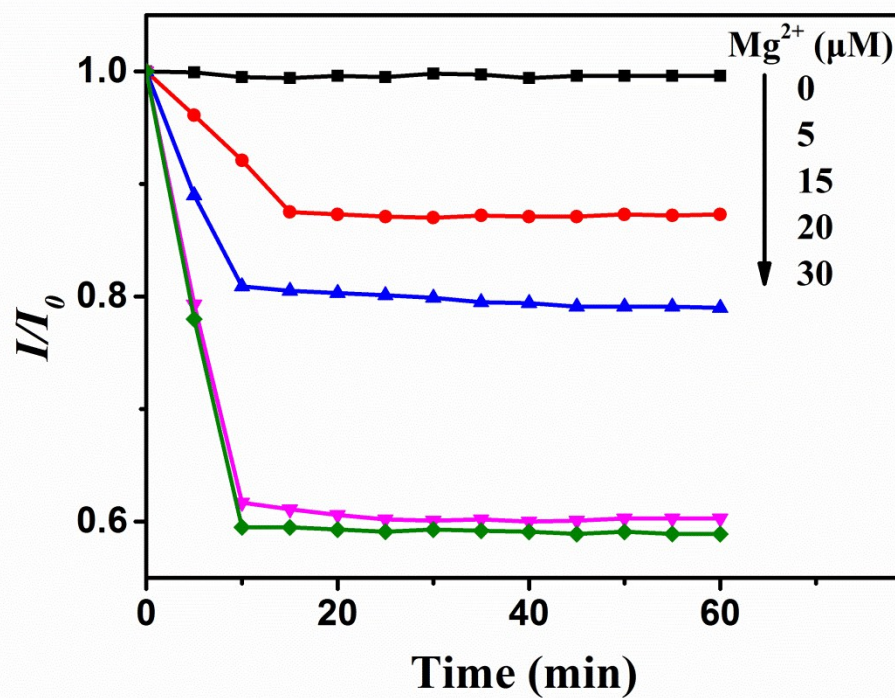

Figure S2. Effect of reaction time on the  $I/I_0$  of the system in 10.0 mM HEPES buffer (pH 7.2) at 37 °C ( $I$  and  $I_0$  represent the luminescence intensity in the presence and absence of PPase respectively).  $\text{Li}^+$ -doped  $\text{NaYF}_4\text{:Yb,Er}$  UCLNPs: 0.228 mg mL<sup>-1</sup>,  $\text{Cu}^{2+}$ : 20.0 mM, PPI: 20.0  $\mu\text{M}$ , PPase: 40.0 mU mL<sup>-1</sup>.

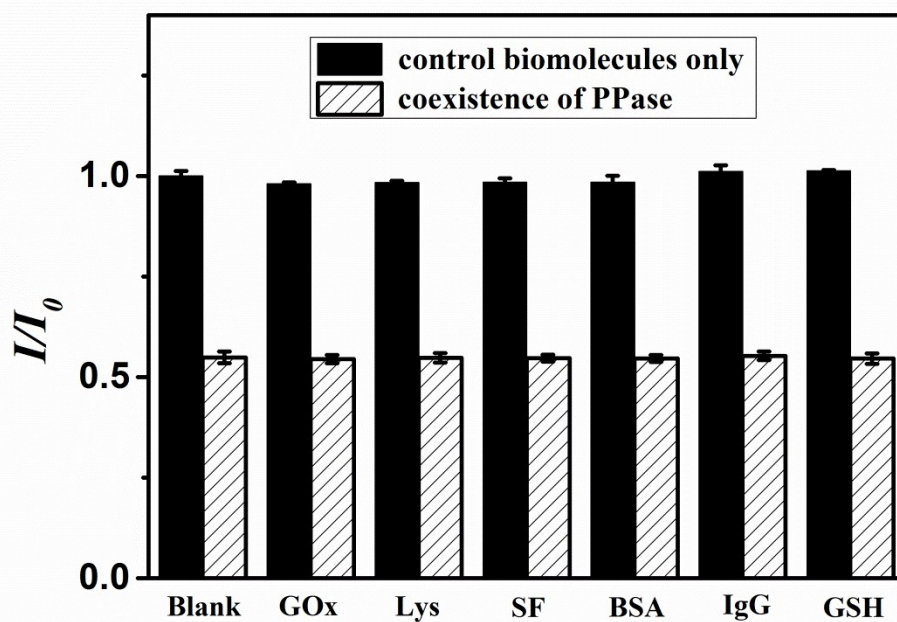

Figure S3. Luminescence response of the UCLNPs upon addition of the control biomolecules in HEPES buffer (10.0 mM, pH 7.2). The concentration of GOx, Lys, SF, BSA, IgG, and GSH was  $10.0 \mu\text{g mL}^{-1}$ ,  $1.46 \mu\text{g mL}^{-1}$ ,  $1.00 \mu\text{g mL}^{-1}$ ,  $10.0 \mu\text{g mL}^{-1}$ ,  $10.0 \mu\text{g mL}^{-1}$ ,  $3.07 \mu\text{g mL}^{-1}$ , respectively (black columns) with  $50.0 \text{ mU mL}^{-1}$  PPase (gray columns). All the assays were recorded based on the UCLNPs solution containing  $\text{Cu}^{2+}$  (20.0 mM), PPi (20.0  $\mu\text{M}$ ) and  $\text{Mg}^{2+}$  (20.0  $\mu\text{M}$ ) after 30 min at 37 °C.
